# Supplementary material for: T‐cell immunoglobulin mucin 3 blockade drives an antitumor immune response in head and neck cancer
Source: PubMed Central journal article supplement (PMC5527458; doi:10.1002/1878-0261.12029), 2017-01-19
Supplement: MOL2-11-235-s001.pdf [file MOL2-11-235-s001.pdf]

## Supplementary Materials

A

### Comparison of *HAVCR2* across 9 Analyses

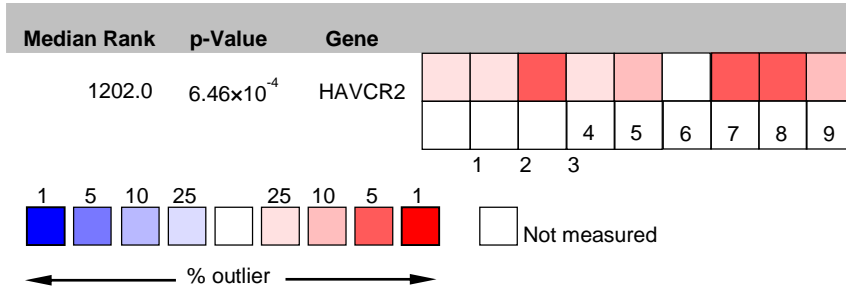

#### Legend

- |                                                                                            |                                                                                                       |
|--------------------------------------------------------------------------------------------|-------------------------------------------------------------------------------------------------------|
| 1. Head and Neck Cancer vs. Normal<br><i>Barretina CellLine 2, Nature, 2012</i>            | 6. Tongue Carcinoma vs. Normal<br><i>Pyeon Multi-cancer, Cancer Res, 2007</i>                         |
| 2. Head and Neck Cancer vs. Normal<br><i>Beroukhim Multi-cancer, Nature, 2010</i>          | 7. Head and Neck Squamous Cell Carcinoma vs. Normal<br><i>Rickman Head-Neck, Oncogene, 2008</i>       |
| 3. Oral Cavity Squamous Cell Carcinoma vs. Normal<br><i>Peng Head-Neck, PLOS One, 2011</i> | 8. Head and Neck Squamous Cell Carcinoma vs. Normal<br><i>Slebos Head-Neck, Clin Cancer Res, 2006</i> |
| 4. Floor of the Mouth Carcinoma vs. Normal<br><i>Pyeon Multi-cancer, Cancer Res, 2007</i>  | 9. Head and Neck Cancer vs. Normal<br><i>Wooster CellLine 2, Not Published, 2008</i>                  |
| 5. Oropharyngeal Carcinoma vs. Normal<br><i>Pyeon Multi-cancer, Cancer Res, 2007</i>       |                                                                                                       |

B

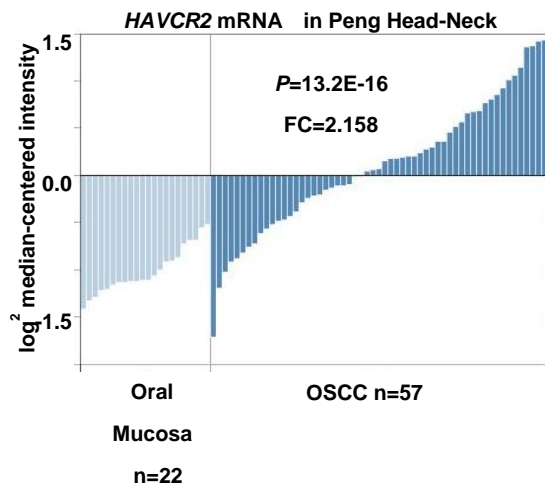

**Supplementary Fig. 1** *HAVCR2* (encoding TIM3) is over-expressed in human HNSCC.

(A) meta-analysis of gene expression profiling for *HAVCR2* in human HNSCC. The colored squares indicated the median rank for *HAVCR2* across each analysis. Data

retrieve from Oncomine database. (B) Significant increase of *HAVCR2* from Peng's dataset.

**Supplementary Table 1.** Clinicopathological statistics of HNSCC used in this study.

| <b>Parameters</b>                       | <b>No.</b> |
|-----------------------------------------|------------|
| <b>Normal Mucosa(Muc)</b>               | 27         |
| <b>Dysplasia(Dys)</b>                   | 43         |
| <b>Primary HNSCC(PH)</b>                | 122        |
| <b>Grade</b>                            |            |
| <b>I</b>                                | 35         |
| <b>II</b>                               | 65         |
| <b>III</b>                              | 22         |
| <b>Lymph node metastasis(negative)</b>  | 78         |
| <b>Lymph node metastasis(positive)</b>  | 44         |
| <b>Recurrent HNSCC(RH)</b>              | 8          |
| <b>HNSCC with pre-radiotherapy (RT)</b> | 12         |
| <b>HNSCC with pre-chemotherapy(TPF)</b> | 11         |
